# Supplementary material for: Yes-Associated Protein (YAP) Facilitates Pressure Overload–Induced Dysfunction in the Diabetic Heart
Source: PubMed Central journal article supplement — JACC Basic Transl Sci. 2019 Sep 23;4(5):611–22. doi: 10.1016/j.jacbts.2019.05.006 (PMC6872826; doi:10.1016/j.jacbts.2019.05.006), 2019-09-23
Supplement: mmc1.pdf [file mmc1.pdf]

# Online Figure 1

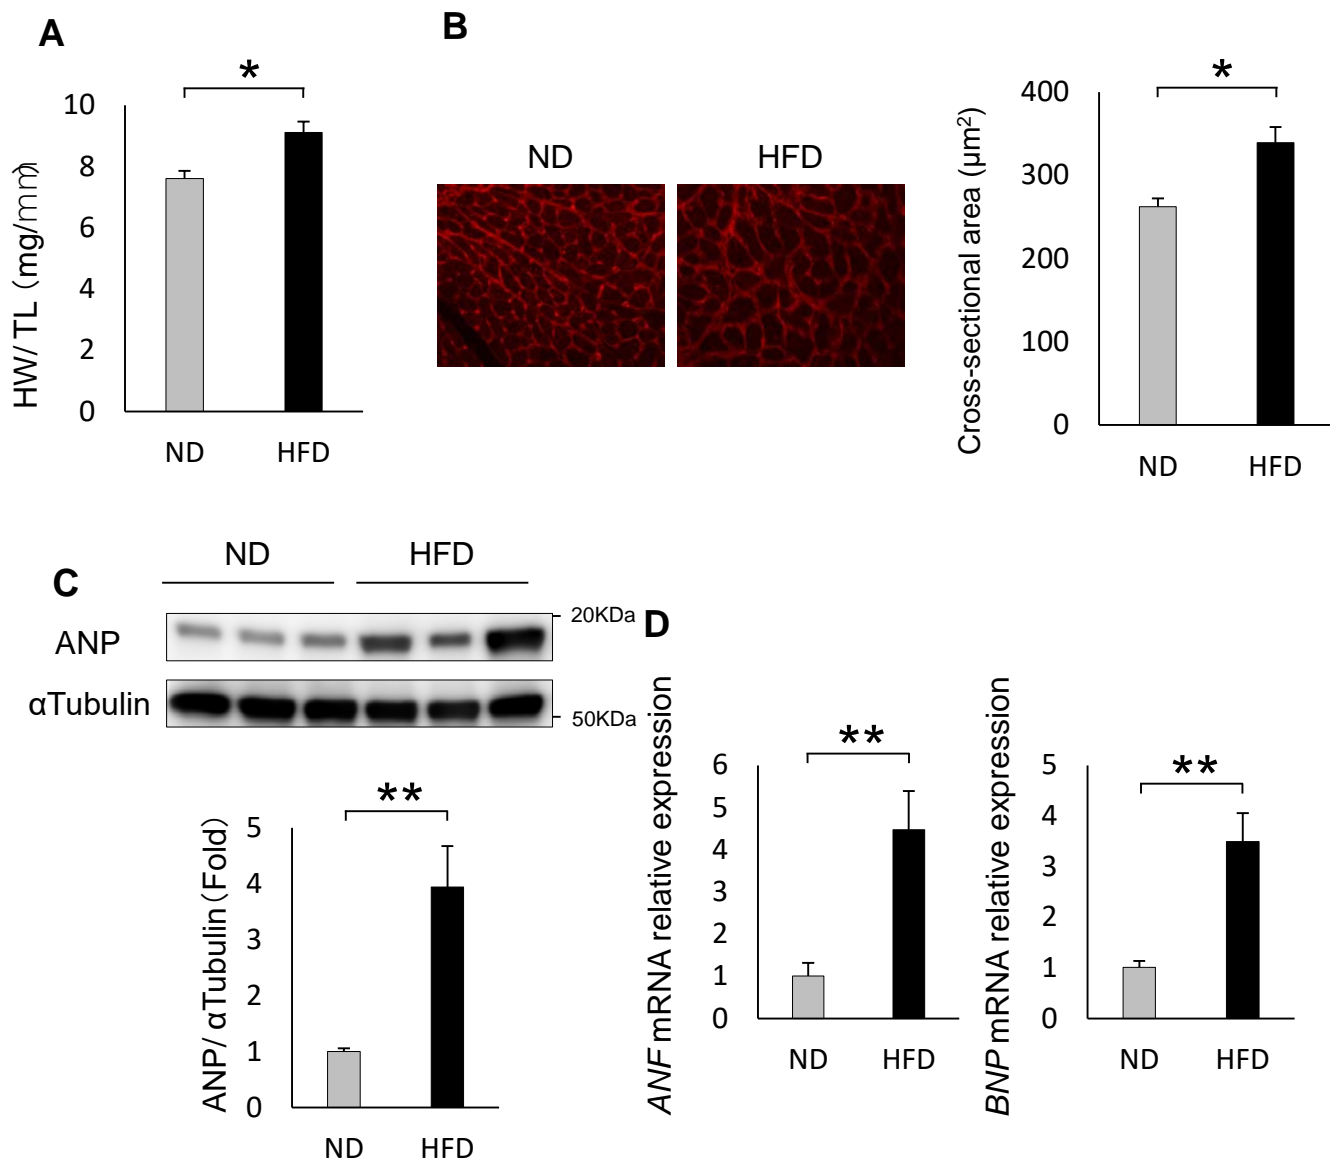

## Online Figure 1. HFD induces cardiac hypertrophy in mice

Mice fed with ND or HFD for 8 weeks. **(A)** Heart weight (HW) to tibial length (LV W/ TL) ratio HFD (n=6, each). **(B)** Representative wheat germ agglutinin staining to assess CM cross-sectional area in mice fed with ND or HFD (n=6, each). **(C)** Representative gel pictures and quantitative analysis of ANP and  $\alpha$ -tubulin in the heart. (n=6, each). **(D)** Analysis of relative mRNA expression of ANF and BNP in mice fed with ND or HFD (n=6, each). All results are expressed as mean  $\pm$  SEM. \*P<0.05, \*\*P<0.01 by ANOVA.

## Online Figure 2

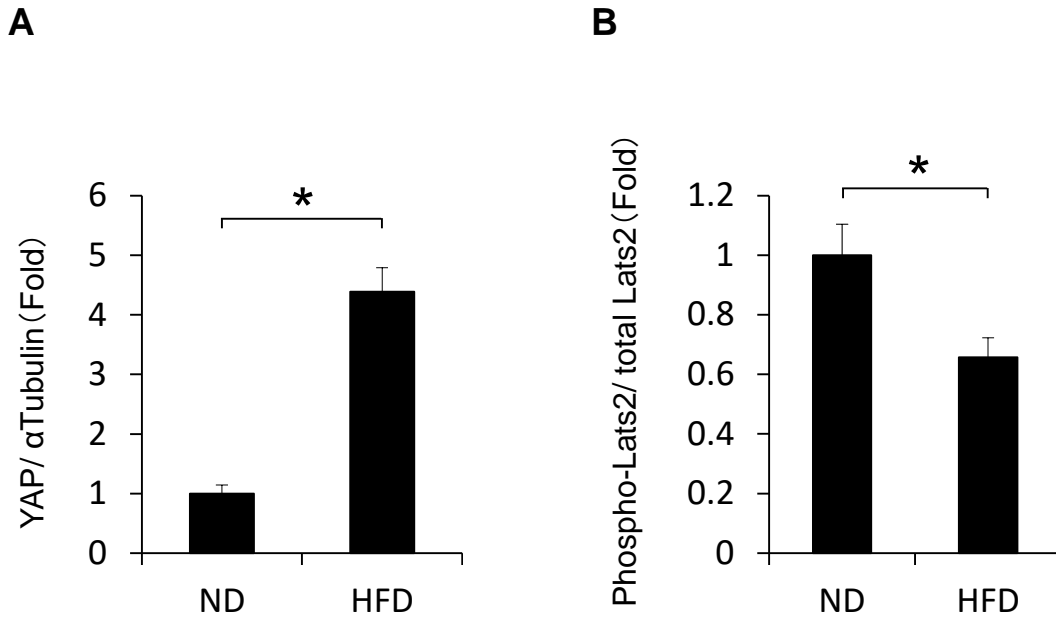

### Online Figure 2. HFD induces cardiac activation of YAP and inactivation of Lats2 in mice

Mice fed with ND or HFD for 8 weeks. Quantitative analysis of immunoblot of YAP/  $\alpha$ -tubulin and phosphoLats2/ total Lats2 in the heart. (n=6, each). All results are expressed as mean  $\pm$  SEM. \*P<0.05 by ANOVA.

# Online Figure 3

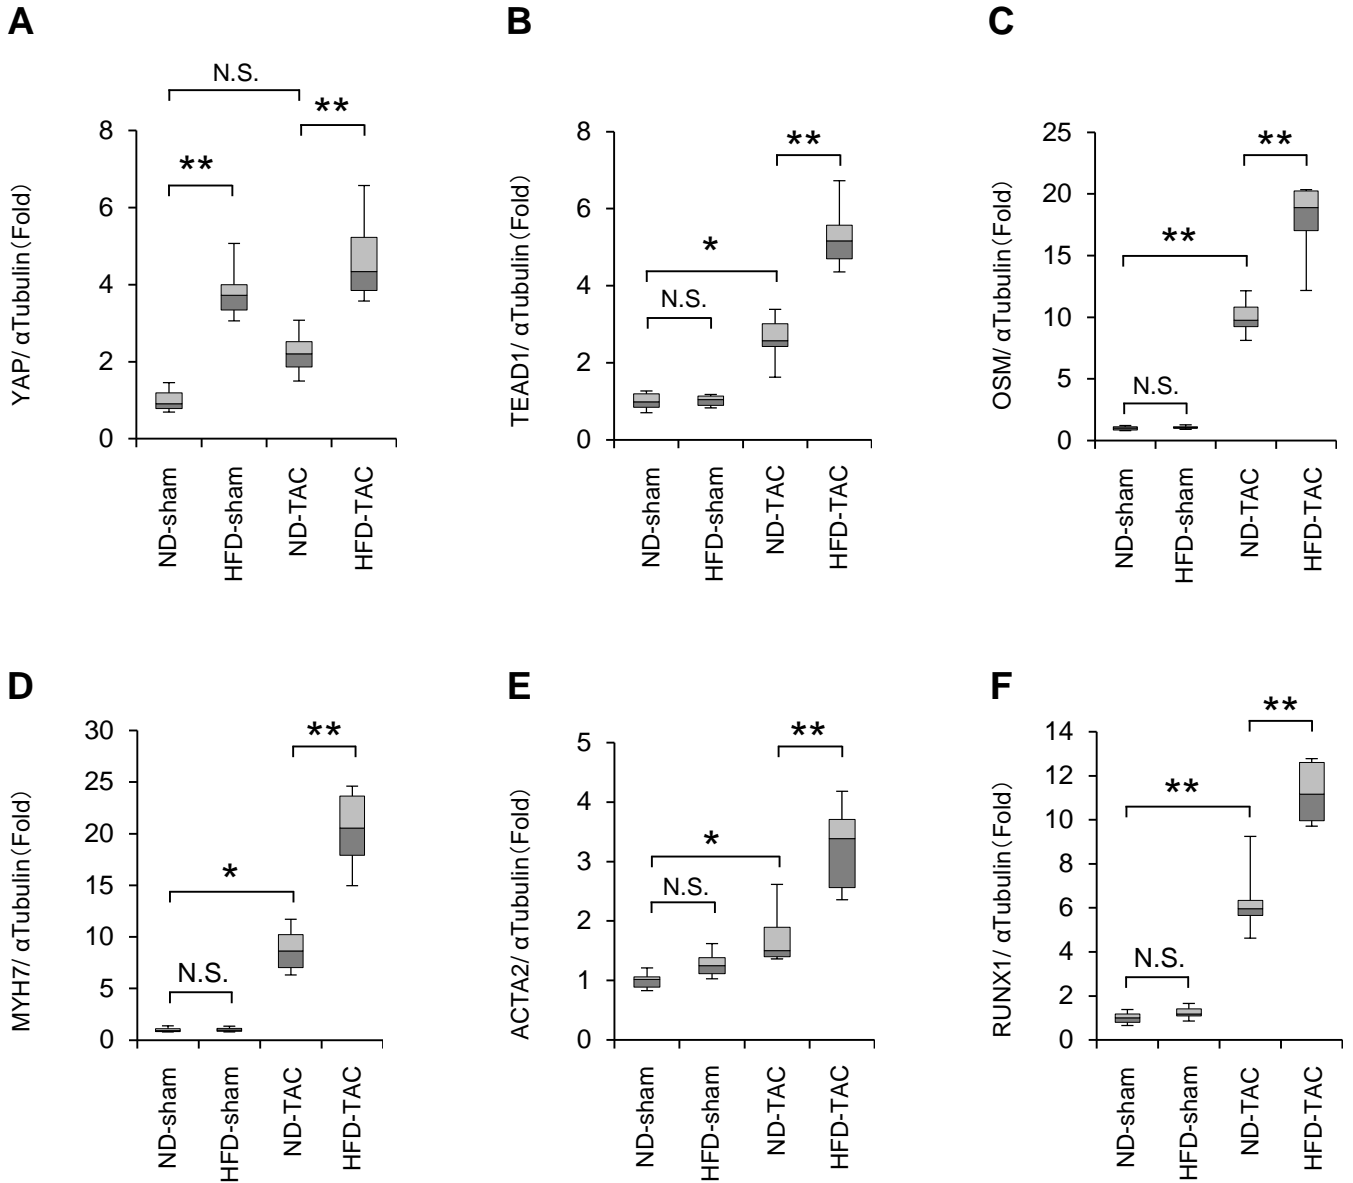

## Online Figure 3. The effect of HFD on CM de-differentiation in response to PO

(A-F) Quantitative analysis of YAP, TEAD1, OSM, MYH7, ACTA2 and RUNX1 in response to PO after HFD treatment. \*\*P<0.01 by ANOVA. The results are from 6 independent experiments. In box plots, whiskers show minimum and maximum values while bars represent the median and 25th and 75th percentiles.

# Online Figure 4

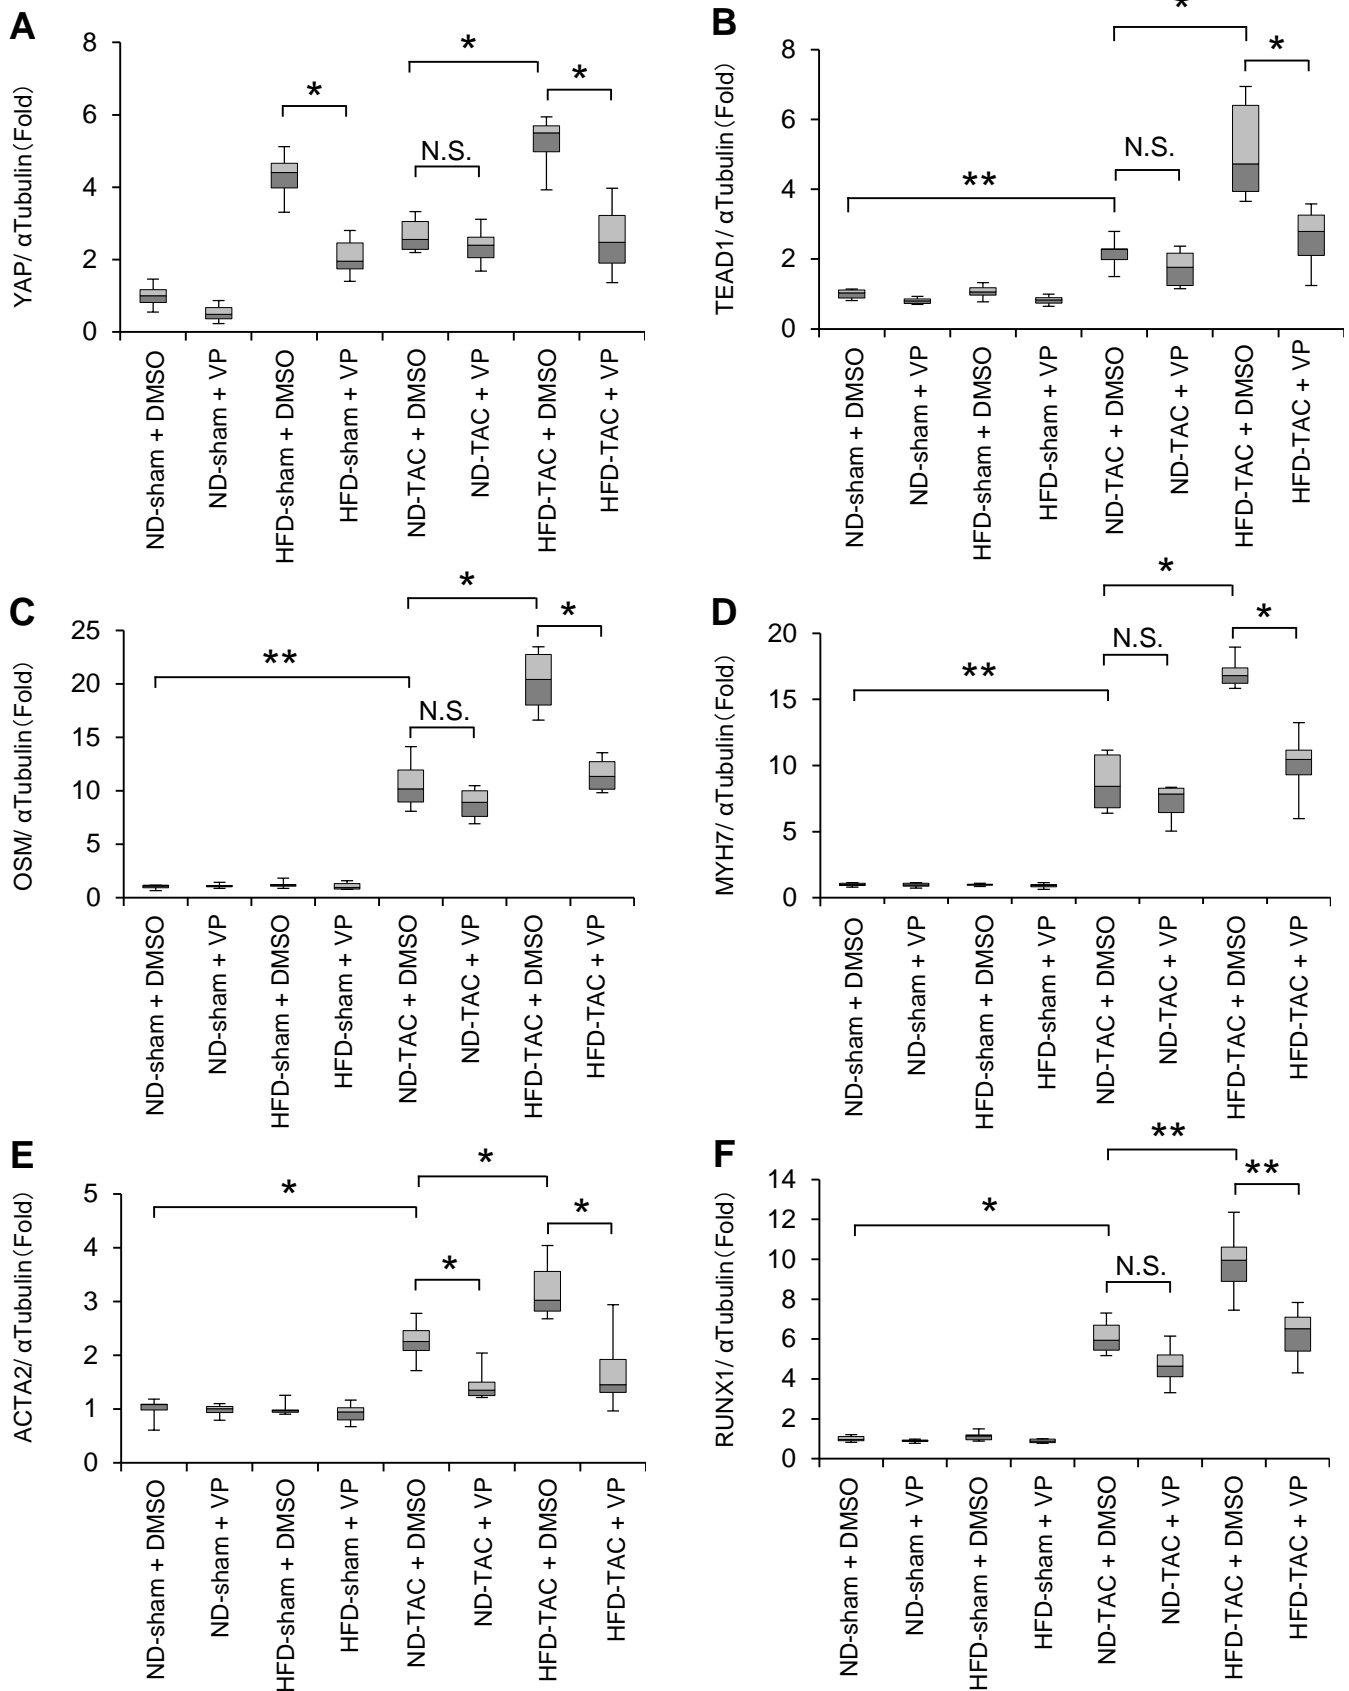

**Online Figure 4. CM de-differentiation with or without Verteporfin in response to PO in the presence of HFD (A-F) Quantitative analysis of YAP, TEAD1, OSM, MYH7, ACTA2 and RUNX1 in the hearts. \*\*P<0.01 by ANOVA. (n=6,each) In box plots, whiskers show minimum and maximum values while bars represent the median and 25th and 75th percentiles.**

# Online Figure 5

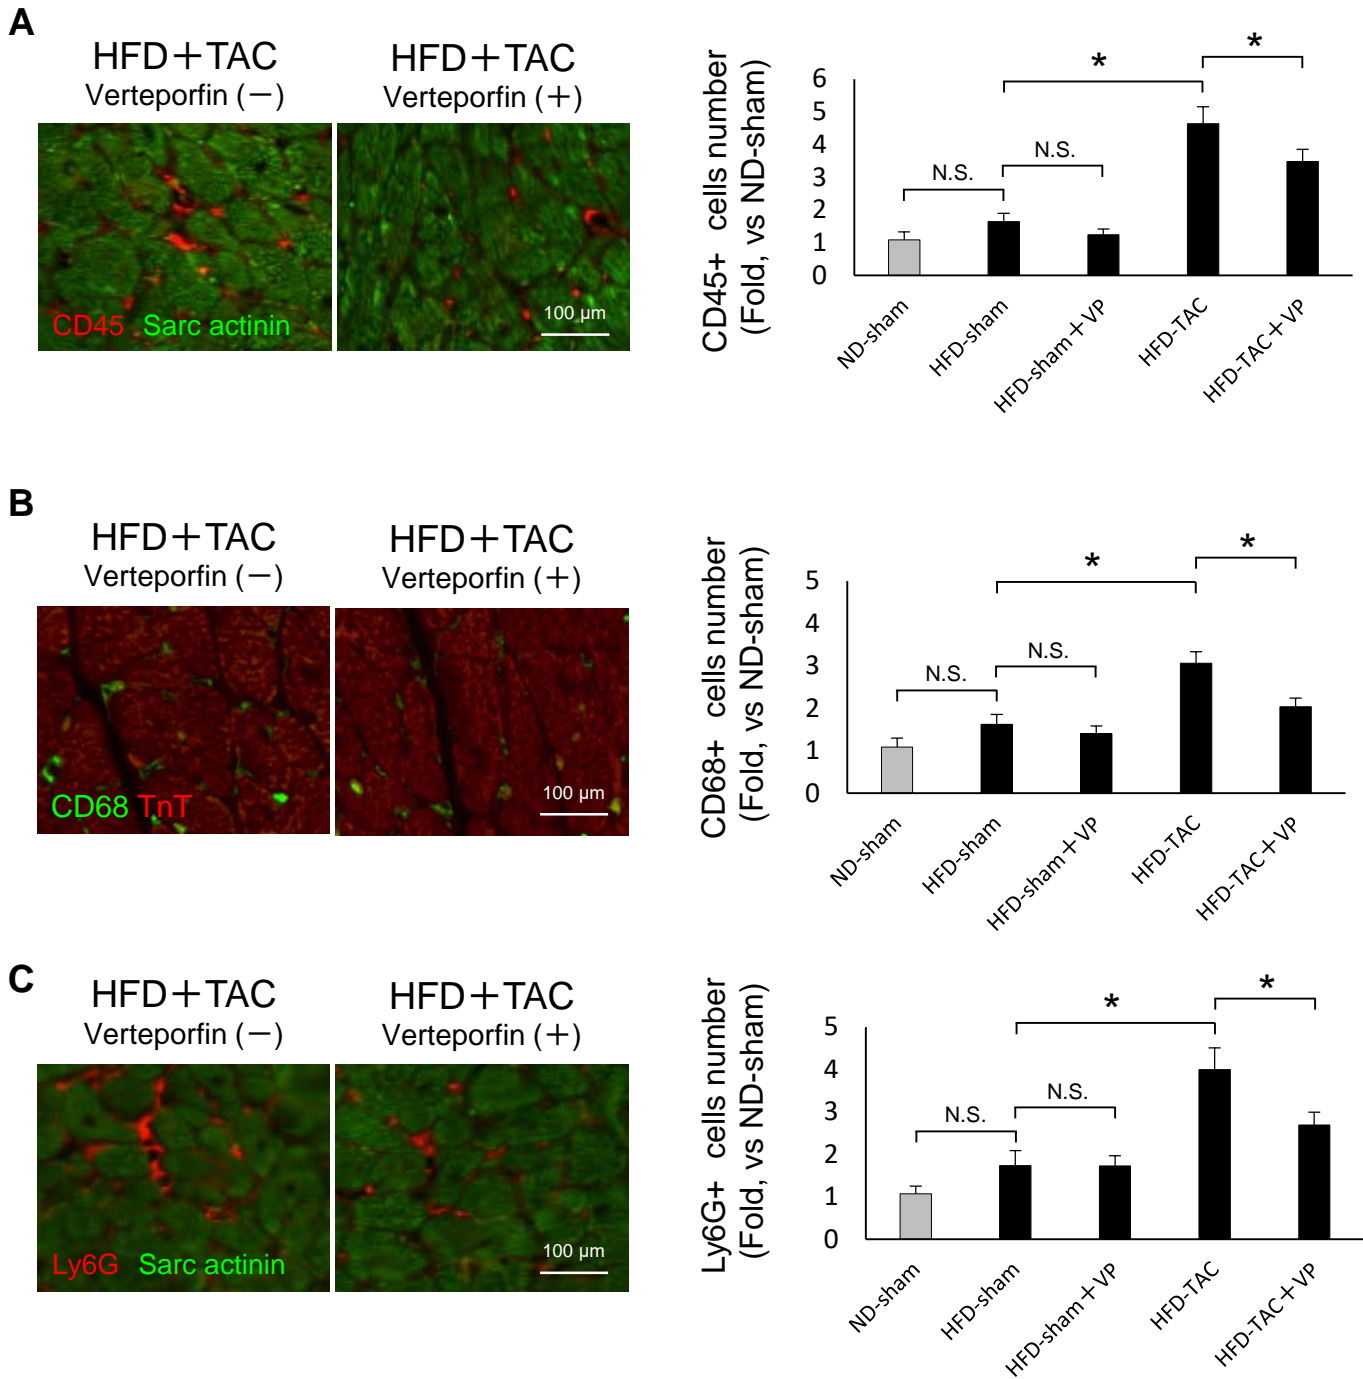

## Online Figure 5. Inflammatory response in the heart during PO in the presence of HFD

(A) Representative immunostaining and quantitative analysis of CD45 (CD45, red; Sarc actinin, green; DAPI, blue) in the hearts 4 weeks after operation, with or without Verteporfin (VP) treatment. (n=4, each) (B) Representative immunostaining and quantitative analysis of CD68 (CD68, green; TnT, red; DAPI, blue) in the hearts 4 weeks after operation, with or without VP treatment. (n=4, each) (C) Representative immunostaining and quantitative analysis of Ly6G (Ly6G, red; Sarc actinin, green; DAPI, blue) in the hearts 4 weeks after operation, with or without VP treatment. (n=4, each) Results are expressed as mean  $\pm$  SEM. \*P<0.05 by ANOVA.

# Online Figure 6

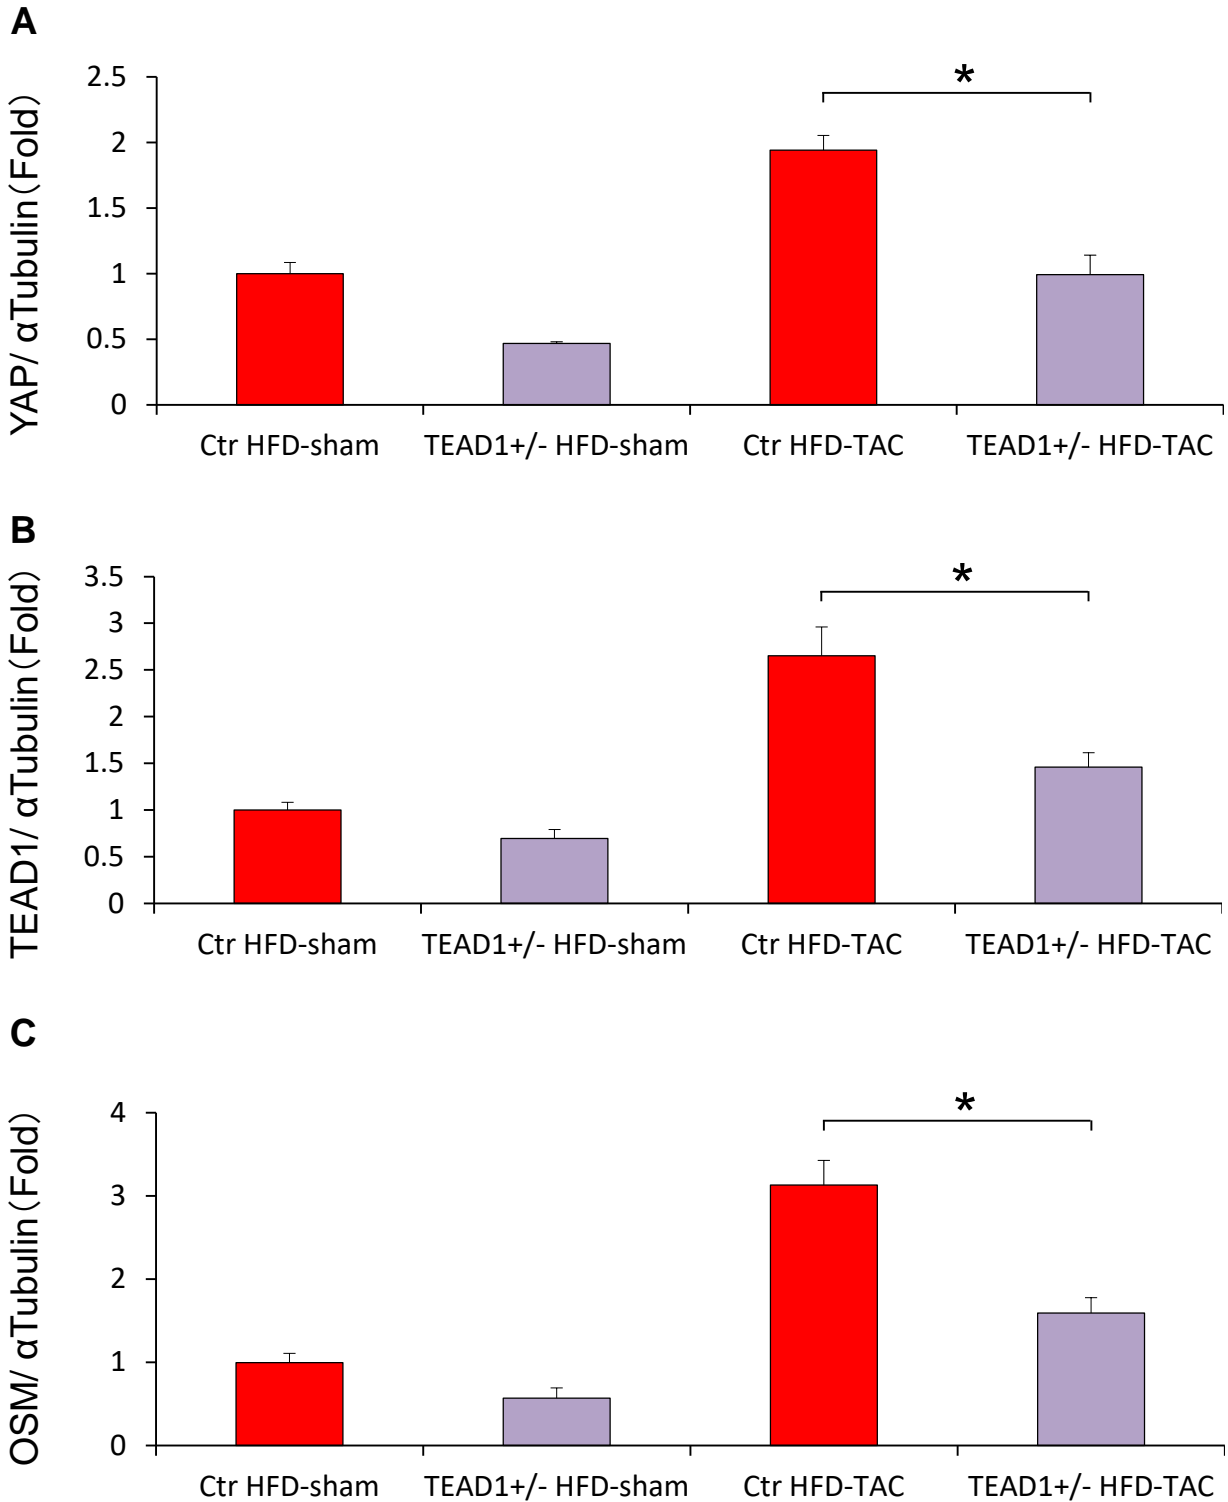

**Online Figure 6. TEAD1 deletion attenuated the YAP-TEAD1-OSM loop during PO in the presence of HFD**

(A-C) Quantitative analysis of the immunoblot of the hearts. (n=6,each) All results are expressed as mean  $\pm$  SEM. \*P<0.05, \*\*P<0.01 by ANOVA.

# Online Figure 7

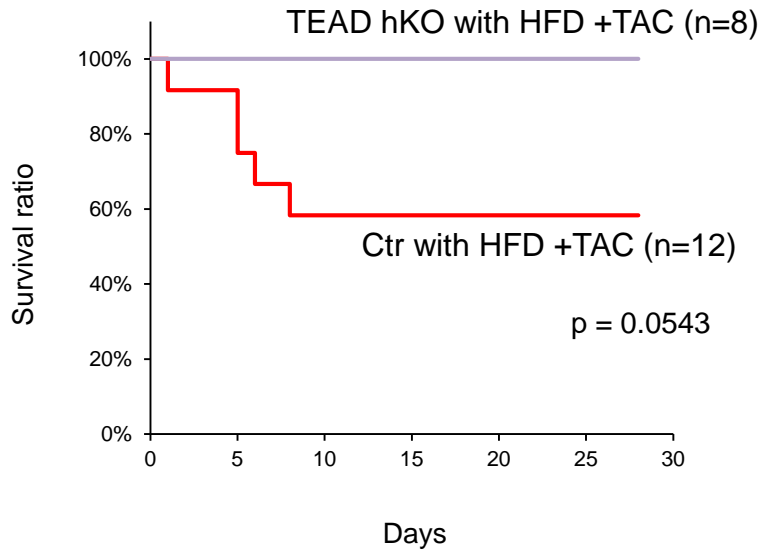

**Online Figure 7. TEAD1 deletion attenuates PO-induced cardiac death in the presence of HFD**  
Kaplan-Meier survival curves after TAC in HFD treated Ctr mice and TEAD1 +/- mice.

# Online Figure 8

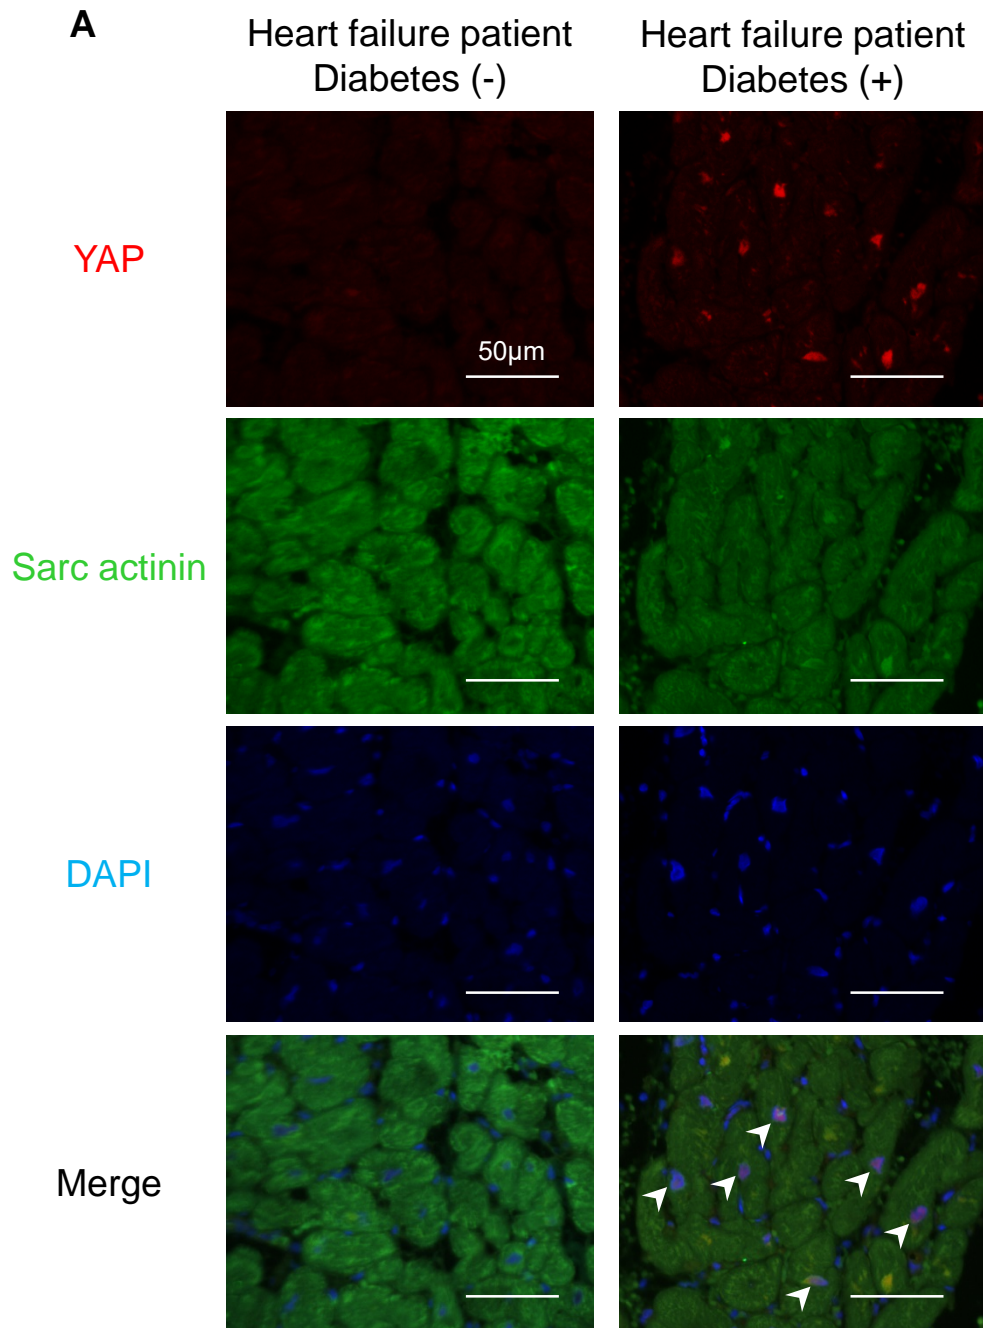



## Online Figure 8 - continued-

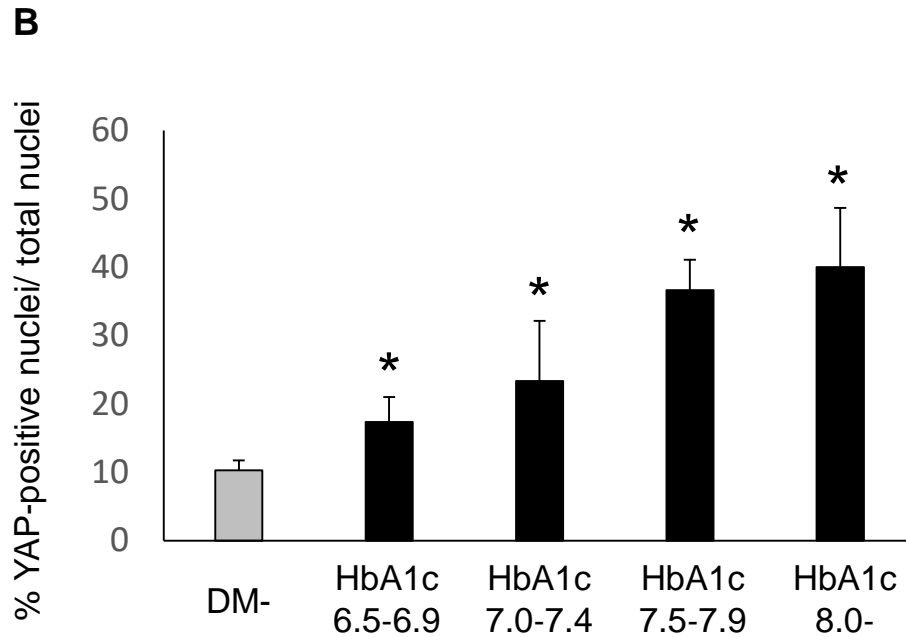

### Online Figure 8. Heart failure patients with diabetes showed YAP activation in CMs

(A) Representative double-immunostaining of YAP and Sarcomeric actinin in heart failure patients with and without diabetes (YAP, red; Sarc actinin, green; DAPI, blue). Nuclear YAP accumulation in CMs is indicated by arrow heads. (B) Quantitative analysis of YAP immunostaining in heart failure patients with and without diabetes. \*P<0.05 versus the patients without diabetes.

## Online Figure 9

*Metabolic syndrome*  
*Diabetes mellitus*

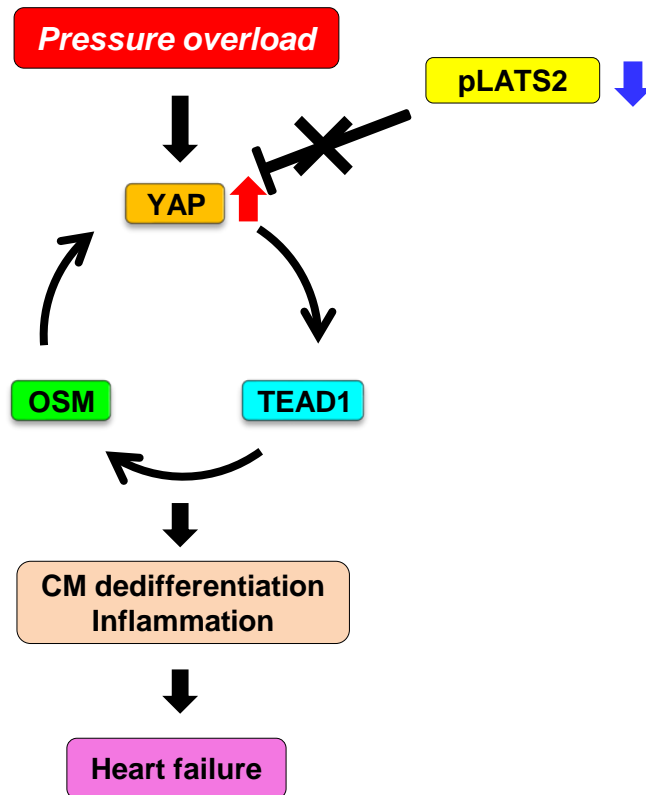

**Online Figure 9. Schematic representation of molecular mechanisms of HFD in response to PO.** PO induces severer cardiac dysfunction accompanied by CM de-differentiation in HFD treated mice through continuous upregulation of YAP. This process is dramatically facilitated by a positive feedback loop consisting of YAP-TEAD1-OSM. We propose that the suppression of YAP-TEAD1 has a novel therapeutic target for the cardiac dysfunction due to CM de-differentiation in metabolic syndrome/ diabetes mellitus with hypertension.

## Online Table 1

|             | ND          | HFD         |
|-------------|-------------|-------------|
| DSEP WT(mm) | 0.73 ± 0.03 | 0.81 ± 0.02 |
| LVEDD(mm)   | 3.47 ± 0.11 | 3.54 ± 0.06 |
| DPWT(mm)    | 0.79 ± 0.03 | 0.85 ± 0.04 |
| LVESD(mm)   | 2.0 ± 0.1   | 2.0 ± 0.1   |
| %FS         | 42.3 ± 1.4  | 42.8 ± 1.2  |
| HR (bpm)    | 494 ± 10    | 474 ± 22    |

**Online Table 1. Echocardiographic analyses of mice treated with ND or HFD for 8 weeks.**

Cardiac function was evaluated with echocardiography (n=6, each). All results are expressed as mean ± SEM.

**DSEP WT**, diastolic septal wall thickness; **LVEDD**, left ventricular end diastolic dimension; **DPWT**, diastolic posterior wall thickness; **LVESD** left ventricular end systolic dimension; **%FS**, fractional shortening; **HR**, Heart rate.

## Online Table 2

|                 | ND         | HFD        |
|-----------------|------------|------------|
| LVSP (mmHg)     | 95.3 ± 4.8 | 94.8 ± 2.4 |
| LVEDP (mmHg)    | 4.7 ± 0.9  | 6.2 ± 0.8  |
| +dP/dt (mmHg/s) | 7625 ± 381 | 6958 ± 395 |
| -dP/dt (mmHg/s) | 7375 ± 417 | 6875 ± 346 |
| HR (bpm)        | 447 ± 10   | 444 ± 12   |

**Online Table 2. Hemodynamic measurements of mice treated with ND or HFD for 8 weeks.**

Hemodynamic study was performed with micromanometer catheter (n=6, each). All results are expressed as mean ± SEM.

**LVSP**, left ventricular systolic pressure; **LVEDP**, left ventricular end diastolic pressure; **+dP/dt** and **-dP/dt**, change in pressure over time; **HR**, Heart rate.

**Online Table 3**

| <b>No.</b> | <b>Age</b> | <b>Sex</b> | <b>BMI</b> | <b>DM</b>  | <b>Hypertension</b> |
|------------|------------|------------|------------|------------|---------------------|
| 1          | 68y0m      | F          | 21.6       | Applicable | under treatment     |
| 2          | 43y4m      | F          | 18.8       | N/A        | under treatment     |
| 3          | 62y1m      | M          | 21.2       | Applicable | under treatment     |
| 4          | 72y7m      | M          | 21.6       | Applicable | under treatment     |
| 5          | 40y11m     | M          | 27.9       | N/A        | N/A                 |
| 6          | 66y10m     | M          | 21.5       | N/A        | under treatment     |
| 7          | 25y3m      | M          | 43.8       | Applicable | N/A                 |
| 8          | 54y8m      | F          | 28.8       | Applicable | under treatment     |
| 9          | 72y8m      | M          | 37.7       | N/A        | under treatment     |
| 10         | 76y8m      | M          | 16.8       | Applicable | under treatment     |
| 11         | 82y4m      | M          | 24.4       | N/A        | under treatment     |
| 12         | 66y0m      | F          | 25.6       | N/A        | under treatment     |
| 13         | 46y2m      | F          | 25.0       | N/A        | N/A                 |
| 14         | 72y1m      | M          | 24.3       | N/A        | under treatment     |
| 15         | 83y1m      | F          | 18.7       | Applicable | under treatment     |
| 16         | 71y3m      | M          | 19.3       | Applicable | under treatment     |
| 17         | 59y11m     | F          | 21.6       | Applicable | under treatment     |
| 18         | 29y10m     | M          | 42.5       | N/A        | under treatment     |
| 19         | 49y11m     | M          | 30.0       | Applicable | under treatment     |
| 20         | 53y8m      | F          | 24.7       | N/A        | under treatment     |
| 21         | 30y0m      | M          | 26.0       | N/A        | untreated           |
| 22         | 46y2m      | F          | 40.0       | N/A        | under treatment     |
| 23         | 49y1m      | M          | 32.2       | Applicable | under treatment     |
| 24         | 69y4m      | M          | 25.6       | N/A        | under treatment     |
| 25         | 52y9m      | M          | 24.1       | N/A        | under treatment     |
| 26         | 42y10m     | F          | 29.4       | Applicable | untreated           |
| 27         | 58y9m      | M          | 24.8       | N/A        | under treatment     |
| 28         | 66y4m      | F          | 19.1       | N/A        | under treatment     |
| 29         | 68y5m      | M          | 22.6       | N/A        | under treatment     |
| 30         | 62y4m      | M          | 23.2       | Applicable | under treatment     |
| 31         | 28y9m      | F          | 28.6       | Applicable | untreated           |
| 32         | 65y1m      | M          | 23.4       | Applicable | under treatment     |
| 33         | 44y5m      | M          | 38.4       | Applicable | under treatment     |
| 34         | 65y10m     | M          | 24.9       | N/A        | under treatment     |
| 35         | 61y8m      | F          | 20.9       | N/A        | under treatment     |
| 36         | 47y5m      | M          | 41.2       | N/A        | under treatment     |

### Online Table 3 - continued-

| No. | Age    | Sex | BMI  | DM         | Hypertension    |
|-----|--------|-----|------|------------|-----------------|
| 37  | 82y3m  | M   | 24.5 | N/A        | under treatment |
| 38  | 73y3m  | M   | 25.0 | N/A        | under treatment |
| 39  | 35y1m  | M   | 35.7 | N/A        | under treatment |
| 40  | 47y11m | M   | 34.5 | Applicable | under treatment |
| 41  | 68y3m  | F   | 25.7 | Applicable | under treatment |
| 42  | 73y1m  | F   | 26.6 | N/A        | under treatment |
| 43  | 25y8m  | M   | 22.0 | N/A        | N/A             |
| 44  | 49y0m  | F   | 26.1 | N/A        | under treatment |
| 45  | 41y8m  | M   | 29.2 | N/A        | under treatment |
| 46  | 57y4m  | F   | 19.4 | Applicable | N/A             |
| 47  | 67y0m  | F   | 19.5 | N/A        | N/A             |
| 48  | 66y7m  | M   | 25.8 | N/A        | under treatment |
| 49  | 38y1m  | M   | 24.5 | N/A        | Untreated       |
| 50  | 43y0m  | F   | 21.2 | N/A        | N/A             |
| 51  | 56y8m  | M   | 24.6 | N/A        | under treatment |
| 52  | 41y1m  | M   | 22.6 | N/A        | under treatment |
| 53  | 75y10m | F   | 20.3 | Applicable | under treatment |
| 54  | 67y1m  | F   | 28.2 | N/A        | under treatment |
| 55  | 47y11m | M   | 18.4 | Applicable | under treatment |
| 56  | 83y3m  | F   | 24.3 | Applicable | under treatment |
| 57  | 57y1m  | F   | 24.8 | N/A        | under treatment |
| 58  | 48y5m  | F   | 24.3 | N/A        | under treatment |
| 59  | 76y7m  | M   | 26.0 | N/A        | under treatment |
| 60  | 49y9m  | M   | 26.5 | N/A        | under treatment |
| 61  | 62y1m  | F   | 23.6 | N/A        | under treatment |
| 62  | 60y0m  | M   | 16.7 | N/A        | under treatment |
| 63  | 62y11m | F   | 22.9 | Applicable | under treatment |
| 64  | 66y0m  | M   | 23.3 | N/A        | under treatment |
| 65  | 68y7m  | F   | 23.5 | Applicable | under treatment |
| 66  | 56y7m  | F   | 20.1 | Applicable | under treatment |

**Online Table 3. The characteristic of patients with heart failure who received myocardial biopsy**  
 Myocardial biopsy specimens were obtained from patients with heart failure for the clinical diagnosis in Tohoku University Hospital. The 66 consecutive observable biopsy specimens were obtained from January 2016 to June 2017. The average Ejection Fraction of heart failure patients was  $33.8 \pm 7.6$  %. Twenty-five patients were diagnosed with DM and their average HbA1c level was  $6.98 \pm 0.68$  %.  
 BMI; body mass index, DM; diabetes mellitus, M; male, F; female

## Online Table 4

|                                      | DM-<br>(n=41) | DM+<br>(n=25) | <i>P</i> value |
|--------------------------------------|---------------|---------------|----------------|
| Age (years)                          | 56.6 ± 14.5   | 59.4 ± 15.0   | 0.42           |
| Male sex, n (%)                      | 26 (63.4)     | 12 (48.0)     | 0.22           |
| Body mass index (kg/m <sup>2</sup> ) | 25.9 ± 5.8    | 25.1 ± 6.7    | 0.20           |
| <b>Medical history, n (%)</b>        |               |               |                |
| Hypertension                         | 34 (82.9)     | 20 (80.0)     | 0.77           |
| Untreated Hypertension               | 2 (4.9)       | 2 (8.0)       | 0.61           |
| Dyslipidemia                         | 30 (73.2)     | 16 (64.0)     | 0.44           |
| <b>Laboratory data</b>               |               |               |                |
| LVEF (%)                             | 33.7 ± 7.0    | 34.1 ± 8.6    | 0.12           |
| HbA1c (%)                            | 5.7 ± 0.3     | 7.0 ± 0.7     | <0.001         |
| Duration of diabetes (month)         |               | 28.3 ± 20.9   |                |
| <b>Medications, n (%)</b>            |               |               |                |
| Calcium channel blocker, n (%)       | 8 (19.5)      | 4 (12.0)      | 0.72           |
| ACE inhibitors/ ARB, n (%)           | 33 (80.5)     | 19 (76.0)     | 0.67           |
| Beta blocker, n (%)                  | 25 (61.0)     | 14 (56.0)     | 0.70           |
| Oral diabetes medicine, n (%)        |               | 22 (88.0)     |                |
| Insulin injection, n (%)             |               | 2 (8.0)       |                |

### Online Table 4. Characteristics of patients with heart failure who underwent myocardial biopsy

Myocardial biopsy specimens were obtained for clinical diagnosis from patients with heart failure in Tohoku University Hospital. All continuous variables are reported as mean ± SD or n (%). To compare two quantitative variables, t-test and chi-square test was used. ACE : angiotensin-converting enzyme, ARB : angiotensin II receptor blocker
